# Supplementary material
Source: publisher site journal article supplement (https://www.dovepress.com/article/414098)
Supplement: Supplementary file 1 [file get_supplementary_file.php]

**Supplementary materials**

Table S1 Compounds identified from the QBD by UPLC-Q/TOF-MS/MS in positive- and negative-ion modes.

| NO. | TR (min) | Molecular  formula | Characteristic ion fragments(m/z) | | Error  (ppm) | Identified compounds |
| --- | --- | --- | --- | --- | --- | --- |
| Precursor | Selective ion |
| 1 | 0.77 | C6H14N4O2 | 174.11168 | 175.1189 [M+H]- | -0.1 | Arginine |
| 2 | 0.79 | C18H32O16 | 504.16903 | 543.1339 [M+K]+ | 1.7 | Raffinose |
| 3 | 0.81 | C5H9NO4 | 147.05316 | 148.0606 [M+H]+ | 0.1 | Glutamic acid |
| 4 | 0.82 | C5H11NO2 | 117.07898 | 118.0860 [M+H]+ | -0.2 | Valine |
| 5 | 0.82 | C9H11NO3 | 181.07389 | 182.082 [M+H]+ | 0.8 | Tyrosine |
| 6 | 0.82 | C15H18O4 | 262.12051 | 307.1175 [M+HCOO]- | -1.2 | Artemisinin |
| 7 | 0.82 | C5H10O5 | 150.05282 | 195.0521 [M+HCOO]- | 1.1 | Arabinose |
| 8 | 0.83 | C5H9NO2 | 115.06333 | 116.0708 [M+H]+ | 0.2 | Proline |
| 9 | 0.84 | C12H22O11 | 342.11621 | 341.1108 [M-H]- | 1.9 | Saccharose |
| 10 | 0.91 | C30H32O13 | 600.18429 | 645.1821 [M+HCOO]- | -0.4 | Benzoyl paeoniflorin oxide |
| 11 | 1.03 | C27H42O20 | 686.22694 | 731.2268 [M+HCOO]- | 1.7 | Digitalis glycosides D |
| 12 | 1.19 | C10H13N5O4 | 267.09675 | 268.1039 [M+H]+ | -0.2 | Adenosine |
| 13 | 3 | C15H20O8 | 328.11582 | 373.1152 [M+HCOO]- | 1.2 | Paeonoside isomer |
| 14 | 5.15 | C25H28O16 | 584.13773 | 585.1453 [M+H]+ | 0.3 | New mangiferin |
| 15 | 5.23 | C23H28O12 | 496.15808 | 495.1525 [M-H]- | 1.7 | Oxypaeoniflorin |
| 16 | 5.34 | C16H18O9 | 354.09508 | 399.0949 [M+HCOO]- | 1.7 | Scopolin |
| 17 | 5.34 | C10H8O4 | 192.04226 | 193.0489 [M+H]+ | -0.6 | 6-methoxy-7-Hydroxycoumarin |
| 18 | 6.15 | C19H18O11 | 422.08491 | 421.0795 [M-H]- | 1.8 | Mangiferin |
| 19 | 6.79 | C9H10O2 | 150.06808 | 151.075 [M+H]+ | -0.4 | Benzyl acetate |
| 20 | 6.79 | C15H20O8 | 328.11582 | 327.109 [M-H]- | 0.5 | Paeonoside |
| 21 | 7.48 | C10H8O4 | 192.04226 | 193.0489 [M+H]+ | -0.6 | 6-methoxy-7-Hydroxycoumarin isomer |
| 22 | 7.69 | C30H32O15 | 632.17412 | 677.1718 [M+HCOO]- | -0.6 | Galloylpaeoniflorin |
| 23 | 7.69 | C27H30O16 | 610.15338 | 611.1625 [M+H]+ | 1.9 | Rutin |
| 24 | 7.71 | C23H28O11 | 480.16316 | 525.1633 [M+HCOO]- | 2 | Paeoniflorin |
| 25 | 8.08 | C22H22O13 | 494.10604 | 495.1133 [M+H]+ | 0 | Marigold-3-*O*-glucoside |
| 26 | 8.08 | C16H12O8 | 332.05322 | 333.0607 [M+H]+ | 0.2 | 5,6,7,3',4'-5-OH-3-methoxy flavone |
| 27 | 8.48 | C30H32O14 | 616.17921 | 661.177 [M+HCOO]- | -0.4 | Mudanpioside H |
| 28 | 9.02 | C45H74O19 | 918.48243 | 919.4894 [M+H]+ | -0.3 | Anemarrhenosaponin D |
| 29 | 9.02 | C39H64O14 | 756.42961 | 757.4355 [M+H]+ | -1.4 | Anemarrhenosaponin A-2 |
| 30 | 9.23 | C50H82O23 | 1050.52469 | 1095.5241 [M+HCOO]- | 1.2 | Anemarsaponin F |
| 31 | 9.56 | C45H74O19 | 918.48243 | 919.4877 [M+H]+ | -2 | Anemarrhenosaponin D isomer |
| 32 | 9.56 | C39H64O14 | 756.42961 | 757.4353 [M+H]+ | -1.6 | Anemarrhenosaponin A-2 isomer |
| 33 | 9.88 | C30H32O13 | 600.18429 | 599.1789 [M-H]- | 1.9 | Benzoyloxypaeoniflorin |
| 34 | 10.08 | C45H74O19 | 918.48243 | 963.4825 [M+HCOO]- | 1.9 | Anemarrhenosaponin D isomer |
| 35 | 10.21 | C39H64O13 | 740.43469 | 741.443 [M+H]+ | 1 | Anemarrhenosaponin A-3 |
| 36 | 10.37 | C13H18O2 | 206.13068 | 251.13 [M+HCOO]- | 1.2 | Artemisinin A |
| 37 | 10.38 | C45H74O18 | 902.48752 | 903.4949 [M+H]+ | 0.1 | Anemarrhenosaponin C |
| 38 | 10.38 | C39H64O13 | 740.43469 | 741.4421 [M+H]+ | 0.1 | Anemarrhenosaponin A-3 isomer |
| 39 | 10.38 | C33H54O8 | 578.38187 | 579.3892 [M+H]+ | 0 | Anemarrhenosaponin A-1 |
| 40 | 10.56 | C31H34O14 | 630.19486 | 629.1889 [M-H]- | 1.3 | Mudanpioside J isomer |
| 41 | 10.71 | C45H76O19 | 920.49808 | 965.4979 [M+HCOO]- | 1.6 | Anemarrhenosaponin B-2 |
| 42 | 10.73 | C8H8O2 | 136.05243 | 181.0511 [M+HCOO]- | 0.5 | Phenyl acetate |
| 43 | 10.82 | C45H76O19 | 920.49808 | 965.498 [M+HCOO]- | 1.8 | Anemarrhenosaponin B-2 isomer |
| 44 | 10.97 | C45H74O19 | 918.48243 | 963.4821 [M+HCOO]- | 1.4 | Anemarrhenosaponin D isomer |
| 45 | 11.15 | C46H78O19 | 934.51373 | 979.5111 [M+HCOO]- | -0.9 | Anemarrhenosaponin B-1 |
| 46 | 11.28 | C46H78O19 | 934.51373 | 979.5114 [M+HCOO]- | -0.6 | Anemarrhenosaponin B-1 isomer |
| 47 | 11.68 | C39H64O15 | 772.42452 | 817.4246 [M+HCOO]- | 1.8 | Anemarrhenosaponin F isomer |
| 48 | 11.71 | C31H34O14 | 630.19486 | 629.1889 [M-H]- | 1.3 | Mudanpioside J |
| 49 | 11.98 | C15H14O6 | 290.07904 | 335.0775 [M+HCOO]- | 0.2 | D-catechin |
| 50 | 12.27 | C33H54O8 | 578.38187 | 579.3884 [M+H]+ | -0.7 | Anemarrhenosaponin A-1 isomer |
| 51 | 12.38 | C45H74O18 | 902.48752 | 903.4937 [M+H]+ | -1.1 | Anemarrhenosaponin C isomer |
| 52 | 12.38 | C39H64O13 | 740.43469 | 741.4407 [M+H]+ | -1.3 | Anemarrhenosaponin A-3 isomer |
| 53 | 12.38 | C33H54O8 | 578.38187 | 579.3885 [M+H]+ | -0.6 | Anemarrhenosaponin A-1 isomer |
| 54 | 13.25 | C39H64O15 | 772.42452 | 817.4239 [M+HCOO]- | 1.2 | Anemarrhenosaponin F isomer |
| 55 | 13.85 | C15H22O3 | 250.15689 | 251.1644 [M+H]+ | 0.3 | Artemisilactone |
| 56 | 14.02 | C39H64O13 | 740.43469 | 741.4421 [M+H]+ | 0.1 | Anemarrhenosaponin A-3 isomer |
| 57 | 14.02 | C33H54O8 | 578.38187 | 579.3894 [M+H]+ | 0.2 | Anemarrhenosaponin A-1 isomer |
| 58 | 14.02 | C27H44O3 | 416.32905 | 417.336 [M+H]+ | -0.3 | Epi-Smilagenin |
| 59 | 14.22 | C50H82O23 | 1050.52469 | 1095.5243 [M+HCOO]- | 1.4 | Anemarsaponin F isomer |
| 60 | 14.83 | C39H64O14 | 756.42961 | 801.4294 [M+HCOO]- | 1.6 | Anemarrhenosaponin G |
| 61 | 15.14 | C15H20O3 | 248.14124 | 271.13 [M+Na]+ | -0.5 | Artemisinin B |
| 62 | 15.58 | C39H64O14 | 756.42961 | 801.429 [M+HCOO]- | 1.2 | Anemarrhenosaponin G isomer |
| 63 | 16.36 | C50H82O23 | 1050.52469 | 1095.5246 [M+HCOO]- | 1.7 | Anemarsaponin F isomer |
| 64 | 16.85 | C15H22O4 | 266.15181 | 289.1415 [M+Na]+ | 0.5 | Artemisinin III |
| 65 | 17.48 | C33H54O8 | 578.38187 | 579.3892 [M+H]+ | 0 | Anemarrhenosaponin A-1 isomer |
| 66 | 17.50 | C39H64O13 | 740.43469 | 785.4347 [M+HCOO]- | 1.8 | Anemarrhenosaponin A-3 isomer |
| 67 | 19.57 | C15H20O2 | 232.14633 | 233.1535 [M+H]+ | -0.1 | Superdeoxy artemisinin B |
| 68 | 20.88 | C15H22O2 | 234.16198 | 235.169 [M+H]+ | -0.3 | Artemisinic acid |
| 69 | 20.95 | C10H10O2 | 162.06808 | 163.0752 [M+H]+ | -0.1 | Methyl cinnamate |

TR: retention time.

Table S2 *In vitro* cytotoxicity screening of chemical components from QBD on lung cancer cells based on preliminary experiments and literature

| **No.** | **Compounds** | **Cells**  **IC50** | **No.** | **Compounds** | **Cells**  **IC50** |
| --- | --- | --- | --- | --- | --- |
| 1 | Artemisinin B | H1299/25.8 μM* | 25 | Benzyl acetate | / |
| 2 | Rutin | A549/559.8 μM1 | 26 | Paeonoside | / |
| 3 | D-catechin | A549/40 μM2 | 27 | Marigold-3-*O*-glucoside | / |
| 4 | Galloylpaeoniflorin | A549/50 μM;  H1299/100 μM3 | 28 | 5,6,7,3',4'-5-OH-3-methoxy flavone | / |
| 5 | Paeoniflorin | H1299/200 μM4 | 29 | Mudanpioside H | / |
| 6 | Mangiferin | H1299/350 μM5 | 30 | Anemarrhenosaponin D | / |
| 7 | Artemisinic acid | H1299/450 μM* | 31 | Anemarrhenosaponin A-2 | / |
| 8 | Adenosine | A549/10 mM6 | 32 | Anemarsaponin F | / |
| 9 | Arginine | / | 33 | Benzoyloxypaeoniflorin | / |
| 10 | Raffinose | / | 34 | Anemarrhenosaponin A-3 | / |
| 11 | Glutamic acid | / | 35 | Artemisinin A | / |
| 12 | Valine | / | 36 | Anemarrhenosaponin C | / |
| 13 | Tyrosine | / | 37 | Anemarrhenosaponin A-1 | / |
| 14 | Artemisinin | / | 38 | Anemarrhenosaponin B-2 | / |
| 15 | Arabinose | / | 39 | Phenyl acetate | / |
| 16 | Proline | / | 40 | Anemarrhenosaponin B-1 | / |
| 17 | Saccharose | / | 41 | Mudanpioside J | / |
| 18 | Benzoyl paeoniflorin oxide | / | 42 | Artemisilactone | / |
| 19 | Digitalis glycosides D | / | 43 | Epi-Smilagenin | / |
| 20 | Paeonoside isomer | / | 44 | Anemarrhenosaponin G | / |
| 21 | New mangiferin | / | 45 | Superdeoxy | / |
| 22 | Oxypaeoniflorin | / | 46 | Artemisinin III | / |
| 23 | Scopolin | / | 47 | Methyl cinnamate | / |
| 24 | 6-methoxy-7-Hydroxycoumarin | / |  |  |  |

*: IC50 determined by cell counting kit-8 assay in this study.

Reference

1. Ben Sghaier M, Pagano A, Mousslim M, Ammari Y, Kovacic H, Luis J. Rutin inhibits proliferation, attenuates superoxide production and decreases adhesion and migration of human cancerous cells. *Biomedicine & pharmacotherapy*. Dec 2016;84:1972-1978. doi:10.1016/j.biopha.2016.11.001

2. Bhardwaj V, Mandal AKA. Next-Generation Sequencing Reveals the Role of Epigallocatechin-3-Gallate in Regulating Putative Novel and Known microRNAs Which Target the MAPK Pathway in Non-Small-Cell Lung Cancer A549 Cells. *Molecules (Basel, Switzerland)*. Jan 21 2019;24(2)doi:10.3390/molecules24020368

3. Gao J, Song L, Xia H, Peng L, Wen ZJRr. 6'-O-galloylpaeoniflorin regulates proliferation and metastasis of non-small cell lung cancer through AMPK/miR-299-5p/ATF2 axis. 2020;21(1):39. doi:10.1186/s12931-020-1277-6

4. Hung J, Yang C, Tsai Y, et al. Antiproliferative activity of paeoniflorin is through cell cycle arrest and the Fas/Fas ligand-mediated apoptotic pathway in human non-small cell lung cancer A549 cells. 2008;35(2):141-7. doi:10.1111/j.1440-1681.2007.04795.x

5. Chi X, Meng J, Lin C, et al. Mangiferin Inhibits Human Lung Adenocarcinoma by Suppressing MiR-27b and MiR-92a. 2021;2021:2822950. doi:10.1155/2021/2822950

6. Tatur S, Kreda S, Lazarowski E, Grygorczyk RJPs. Calcium-dependent release of adenosine and uridine nucleotides from A549 cells. 2008;4(2):139-46. doi:10.1007/s11302-007-9059-x

Supplementary Figure S1

***Identification of targets and pathways of QBD-mediated lung cancer therapy by network pharmacology***

113 components and 2454 targets of QBD were screened from TCMSP database, and 18258 lung cancer-related targets were obtained from GeneCards, TTD, OMIM, PharmGKB, and DrugBank databases. As shown in Supplementary Fig S1 A, B, Venn analysis showed that there were 205 overlapping targets between QBD targets and lung cancer-related targets, which could be used as candidate targets for QBD to treat lung cancer. Using Cytoscape 3.8.0, a composite target network between QBD and lung cancer is constructed, which consists of 240 nodes (32 active components and 206 targets) and 544 edges. The GO and KEGG functional enrichment analyses were carried out based on the potential targets of QBD. The results of GO analysis showed that the 205 genes were enriched in 2583 GO entries (*P* < 0.05), including 2287 biological progress (BP), 79 cellular components (CC), and 217 molecular functions (MF), and the top 10 entries of BP, CC, and MF are shown in Supplementary Fig. S1 C. In the KEGG pathway analysis, a total of 179 significantly enriched signaling pathways were obtained (*P* < 0.05), and the most significant KEGG signaling pathways closely related to lung cancer were listed in Supplementary Fig. S1 D, including apoptosis, PI3K-Akt signaling pathway, TNF signaling pathway, IL-17 signaling pathway, *etc*. Among these enriched pathways, apoptosis acted an important role in lung cancer.


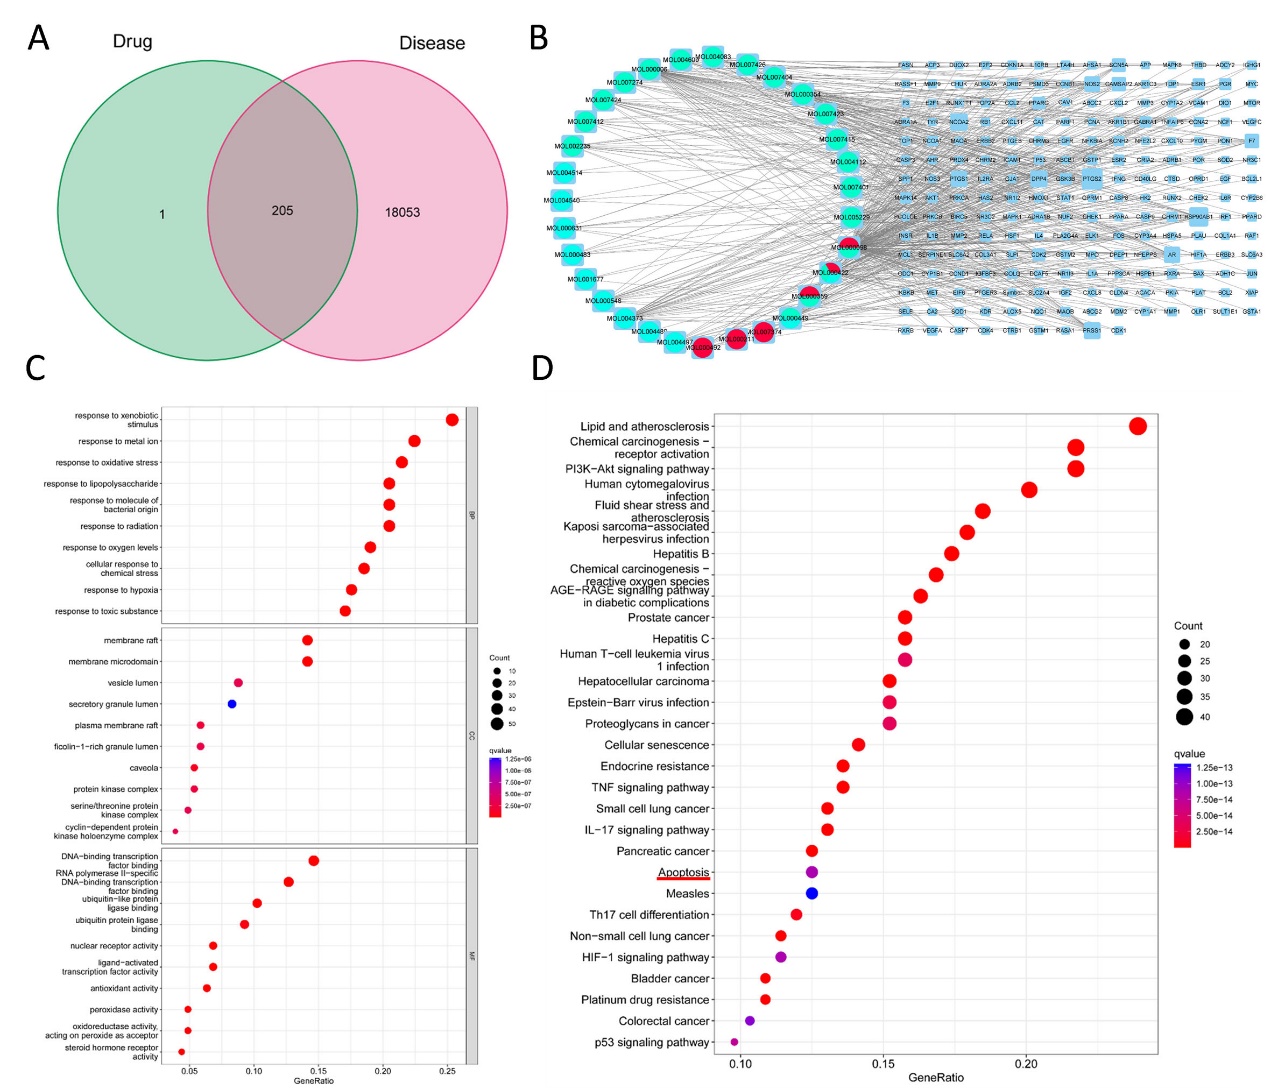


Supplementary Figure S1 Network pharmacology of QBD in lung cancer. (A) Venn diagram summarizing the intersection of targets of the QBD and lung cancer. (B) The network of ingredient-target-disease. The circle on the left, green, red, blue, and yellow represent the effective components of Qing Hao, Mu Dan Pi, Zhi Mu, and Bie Jia, respectively. The grid on the right represents the target of QBD, and the larger and more edges represent the stronger connectivity between the target and the active components. (C) The top 30 of GO enrichment analysis. (D) The top 30 of KEGG enrichment analysis. BP, Biological progress of core targets; CC, Cellular components of core targets; MF, The molecular function of core targets.
